# Supplementary material for: Cerebral Cortex Structure Changes and Their Correlation with Cognitive Function in Lung Cancer Patients
Source: Research Square preprint supplement (doi:10.21203/rs.3.rs-1401186/v2), 2022-07-13
Supplement: Supplementary file 1 [file 4fc26b7f2bf9fe5f75bdb9bc.docx]

Table S2 Analysis of clinical stage, pathological type and treatment protocol of D2 group on impaired daily living ability and cognitive function

| Cognitive assessment | Pathological type | | P-value | Clinical classification | | P-value | | Treatment protocol | | --- | | | P-value |
| --- | --- | --- | --- | --- | --- | --- | --- | --- | --- | --- |
| SCLC | NSCLC | III | IV | chemotherapy | chemoradiotherapy |
| ADL (scores) | 16.53±5.33 | 18.77±2.83 | 0.17 | 17.6±2.59 | 19.5±2.88 | 0.79 | 18.00±3.61 | 18.38±2.73 | 0.7 |
| MoCA (scores) |  |  |  |  |  |  |  |  |  |
| visual space and executive ability | 0.67±0.58 | 2 (1,3.5) # | 0.09 | 1.15±1.18 | 2.17±1.60 | 0.33 | 2.00±1.73 | 1 (1,2.5) # | 0.83 |

# non-normal data are represented by Mean (P25%, 75%).
